# Supplementary material for: Optimal fluorescence and photosensitivity properties of dual-functional NaYb1−xF4:Tmx3+ nanoparticles for applications in imaging guided photodynamic therapy
Source: Royal Society of Chemistry journal article supplement (doi:10.1039/d0ra09544c), 2021-01-01
Supplement: d0ra09544c1.pdf [file d0ra09544c1.pdf]

## Supporting Information

### **Optimal fluorescence and photosensitivity properties of dual-functional NaYb<sub>1-x</sub>F<sub>4</sub>:Tm<sup>3+</sup><sub>x</sub> nanoparticles for applications in imaging guided photodynamic therapy**

Zhang Jiayin,<sup>a</sup> Wang Qiyu,<sup>\*b</sup> Liang Hong,<sup>a</sup> Song Guoli,<sup>\*a</sup> and Zhang Zhiguo,<sup>\*c</sup>

*a School of Technology, Harbin University, Harbin 150086, China*

*b School of Physics & Electronic Engineering, Harbin Normal University, Harbin 150025, China*

*c School of Instrumentation Science and Engineering, Harbin Institute of Technology, Harbin 150080,*

*P.R. China*

## I. Theoretically investigate intensity of 800 nm emission

In order to understand the change of the 800 nm emission theoretically, rate equations in the steady states based on the process of energy transitions are proposed as follows:

$$\frac{dN_1}{dt} = 0 = W_0 N_{Yb1} N_0 - W_1 N_{Yb1} N_1 - \frac{N_1}{\tau_1} \quad (1)$$

$$\frac{dN_2}{dt} = 0 = W_1 N_{Yb1} N_1 - W_2 N_{Yb1} N_2 - \frac{N_2}{\tau_2} \quad (2)$$

$$\frac{dN_{Yb1}}{dt} = 0 = \rho \sigma_{Yb} N_{Yb0} - W_0 N_{Yb1} N_0 - W_1 N_{Yb1} N_1 - W_2 N_{Yb1} N_2 - \frac{N_{Yb1}}{\tau_{Yb1}} \quad (3)$$

where  $N_i$  ( $i= 0, 1, 2$ ) are population densities of the  $^3H_6$ ,  $^3F_4$  and  $^3H_4$  states of the  $Tm^{3+}$  ions, respectively;  $N_{Yb0}$  and  $N_{Yb1}$  are the population densities of ground and excited states of  $Yb^{3+}$ , respectively;  $\tau_x$  are the decay times of relevant levels;  $W_i$  are the energy transfer rates from the excited state of  $Yb^{3+}$  to the  $N_i$  levels of  $Tm^{3+}$ ;  $\rho$  denotes the laser photon number density;  $\sigma_{Yb}$  is the absorption cross section of  $Yb^{3+}$ .

In the steady state rate equation above, all terms involving upconversion process in Eq. S3 would be neglected due to their contribution being much less than that of the pump laser. Meanwhile, the upconversion terms  $W_1 N_{Yb1} N_1$  in Eq. S1 and  $W_2 N_{Yb1} N_2$  in Eq. S2 are also neglected owing to the fact that the rates of energy transmission in the upconversion processes are much less than the decay rates of relevant energy levels. In this way, the population densities  $N_2$  and the 800 nm emission intensity can be described as below (Eq. S4 and Eq. S5):

$$N_2 = \rho^2 \sigma_{Yb}^2 W_0 W_1 N_0 (N_{Yb0} \tau_{Yb1})^2 \tau_1 \tau_2 \quad (4)$$

$$I_{800} = \frac{N_2}{\tau_2} = \rho^2 \sigma_{Yb}^2 W_0 W_1 N_0 (N_{Yb0} \tau_{Yb1})^2 \tau_1 \quad (5)$$

## II . Morphology and structural characteristics

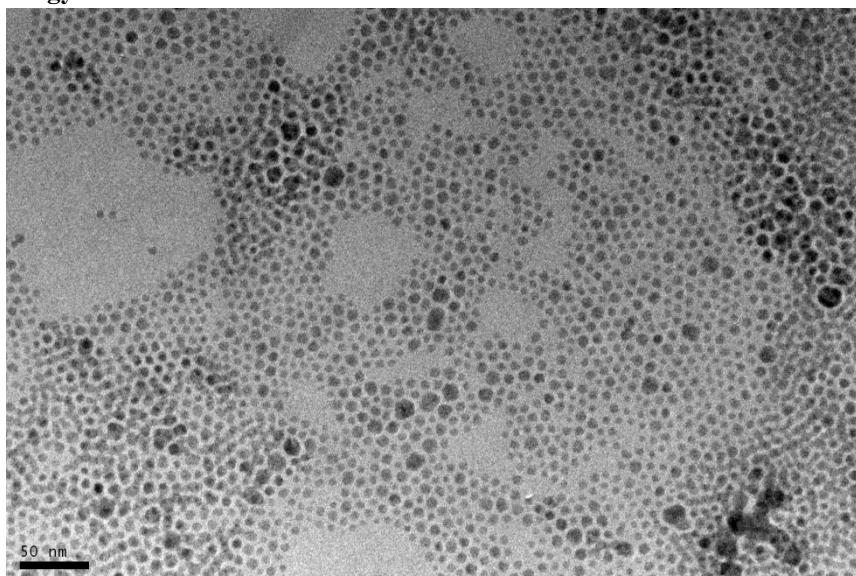

Figure S1. A low magnification TEM of NaYb<sub>99%</sub>F<sub>4</sub>:Tm<sup>3+</sup><sub>1%</sub>.

| Statistical report |         |        |        |
|--------------------|---------|--------|--------|
| Distribution/nm    | Mean/nm | Amount | Freq.  |
| 4-4.6              | 4.3     | 4      | 2.21%  |
| 4.6-5.2            | 4.9     | 10     | 5.52%  |
| 5.2-5.8            | 5.5     | 28     | 15.47% |
| 5.8-6.4            | 6.1     | 32     | 17.68% |
| 6.4-7              | 6.7     | 44     | 24.31% |
| 7-7.6              | 7.3     | 27     | 14.92% |
| 7.6-8.2            | 7.9     | 22     | 12.15% |
| 8.2-8.8            | 8.5     | 5      | 2.76%  |
| 8.8-9.4            | 9.1     | 7      | 3.87%  |
| 9.4-10             | 9.7     | 2      | 1.1%   |

Table S1. Statistical report for particle size distribution

|         |      |
|---------|------|
| Total   | 181  |
| Max./nm | 9.72 |
| Min./nm | 4.09 |
| Mean/nm | 6.68 |

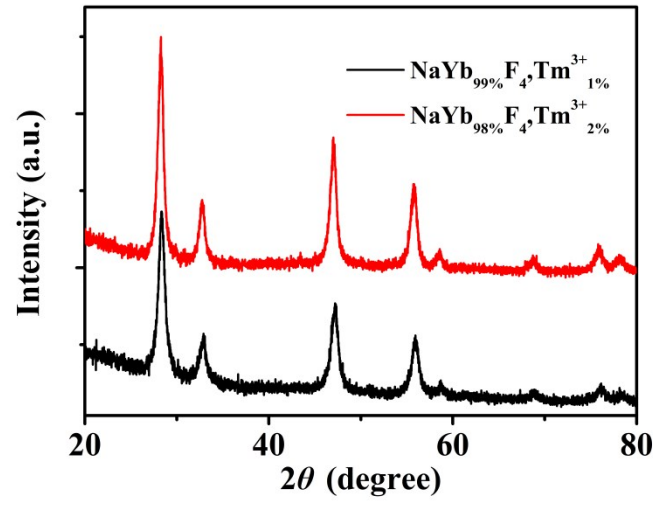

Figure S2. XRD patterns of  $\text{NaYb}_{1-x}\text{F}_4\text{Tm}^{3+}_x$  with  $x=1\%$  and  $2\%$

### III. The 800 nm upconversion fluorescence spectra

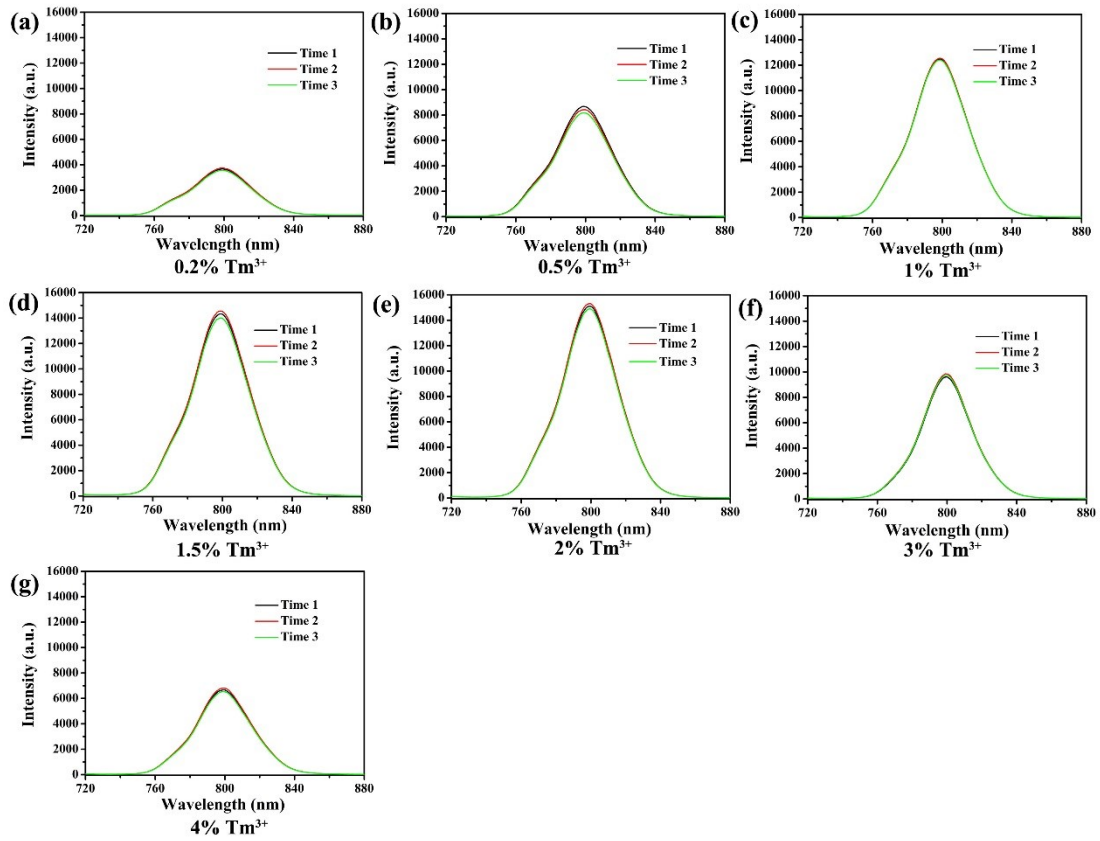

Figure S3. The 800 nm upconversion fluorescence spectra in NaYb<sub>1-x</sub>F<sub>4</sub>:Tm<sup>3+</sup><sub>x</sub> NPs.

- (a) corresponding to Tm<sup>3+</sup> concentration of 0.2%
- (b) corresponding to Tm<sup>3+</sup> concentration of 0.5%
- (c) corresponding to Tm<sup>3+</sup> concentration of 1%
- (d) corresponding to Tm<sup>3+</sup> concentration of 1.5%
- (e) corresponding to Tm<sup>3+</sup> concentration of 2%
- (f) corresponding to Tm<sup>3+</sup> concentration of 3%
- (g) corresponding to Tm<sup>3+</sup> concentration of 4%

#### IV. DPBF absorbance spectra

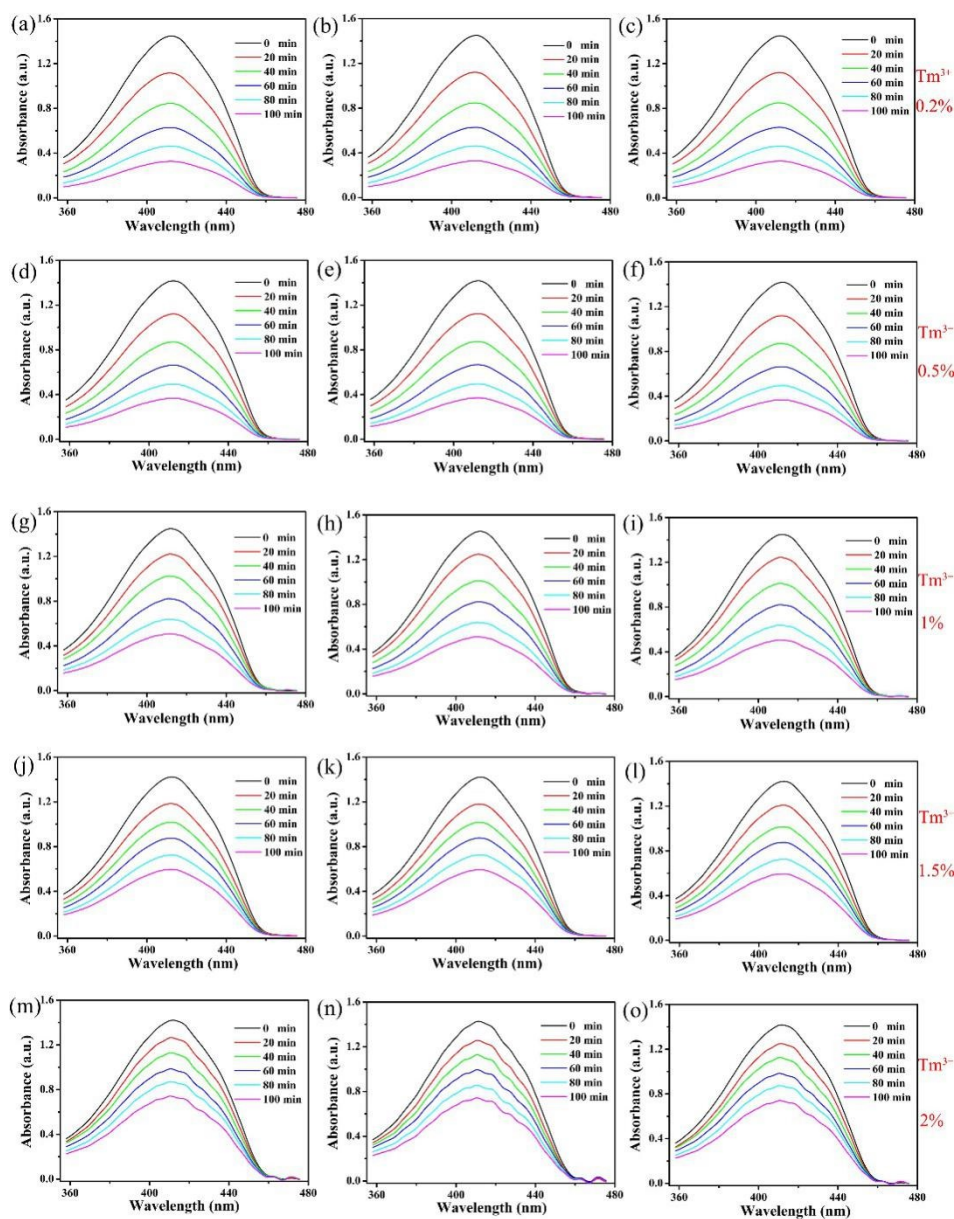

Figure S4. The 1,3-diphenylisobenzofuran (DPBF) absorbance spectra in solutions with  $\text{NaYb}_{1-x}\text{F}_4:\text{Tm}^{3+}_x$  NPs.

(a),(b),(c) corresponding to  $\text{Tm}^{3+}$  concentration of 0.2%

(d),(e),(f) corresponding to  $\text{Tm}^{3+}$  concentration of 0.5%

(g),(h),(i) corresponding to  $\text{Tm}^{3+}$  concentration of 1%

(j),(k),(l) corresponding to  $\text{Tm}^{3+}$  concentration of 1.5%

(m),(n),(o) corresponding to  $Tm^{3+}$  concentration of 2%
